# Supplementary material
Source: Springer Nature journal article supplement (https://www.springermedizin.de/resource/supplementary/12872_2007_28_MOESM4_ESM.pdf/9431160)

A

Model 1: UA vs. STEMI  
 Model 2: UA vs. STEMI  
 Model 3: UA vs. STEMI  
 Model 4: UA vs. STEMI  
 Model 6: UA vs. STEMI

Model 1: UA vs. NSTEMI  
 Model 2: UA vs. NSTEMI  
 Model 3: UA vs. NSTEMI  
 Model 4: UA vs. NSTEMI  
 Model 6: UA vs. NSTEMI

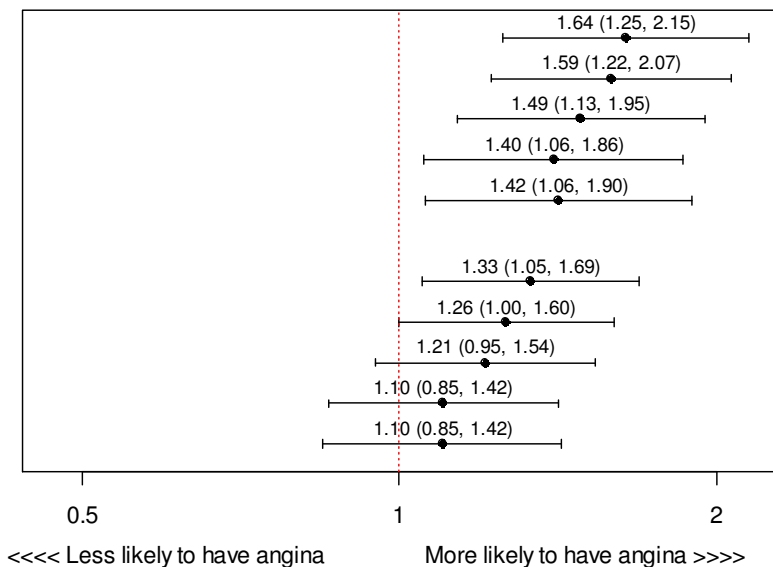

B

Model 1: UA vs. STEMI  
 Model 2: UA vs. STEMI  
 Model 3: UA vs. STEMI  
 Model 4: UA vs. STEMI  
 Model 5: UA vs. STEMI  
 Model 6: UA vs. STEMI

Model 1: UA vs. NSTEMI  
 Model 2: UA vs. NSTEMI  
 Model 3: UA vs. NSTEMI  
 Model 4: UA vs. NSTEMI  
 Model 5: UA vs. NSTEMI  
 Model 6: UA vs. NSTEMI

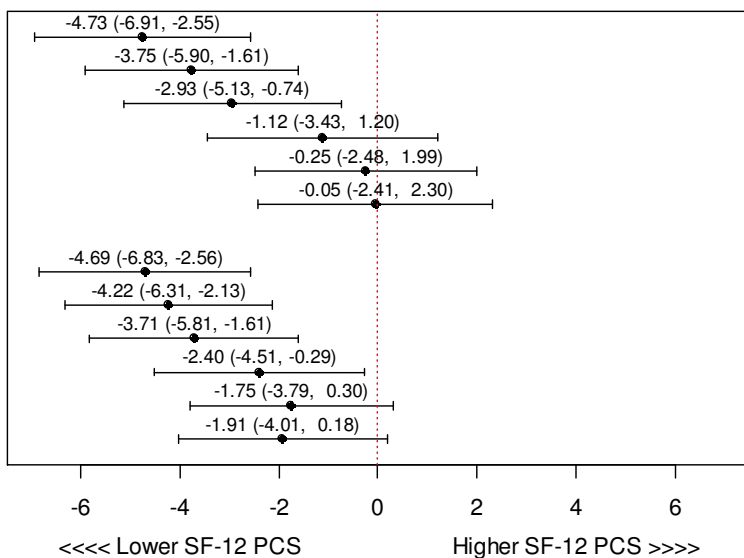

C

Model 1: UA vs. STEMI  
 Model 2: UA vs. STEMI  
 Model 3: UA vs. STEMI  
 Model 4: UA vs. STEMI  
 Model 5: UA vs. STEMI  
 Model 6: UA vs. STEMI

Model 1: UA vs. NSTEMI  
 Model 2: UA vs. NSTEMI  
 Model 3: UA vs. NSTEMI  
 Model 4: UA vs. NSTEMI  
 Model 5: UA vs. NSTEMI  
 Model 6: UA vs. NSTEMI

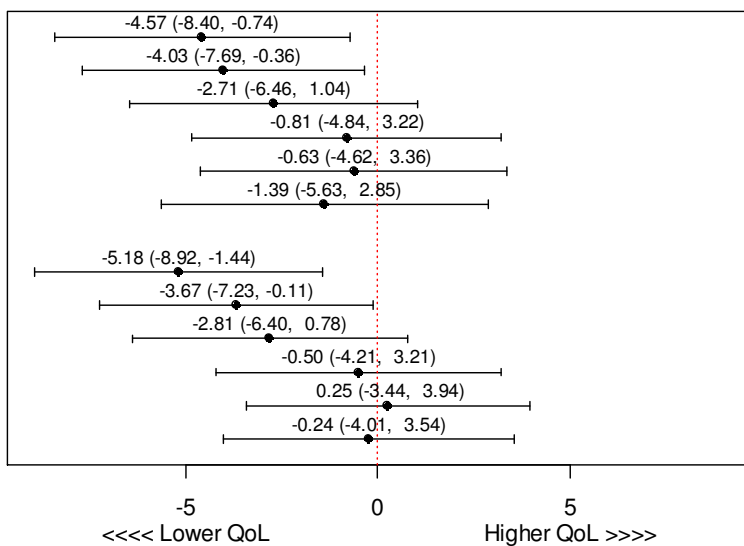

Supplement: MOESM4 [file 9431160]
